# Supplementary material for: On the Causes of Rapid Diversification in the Páramos: Isolation by Ecology and Genomic Divergence in Espeletia
Source: Front Plant Sci. 2018 Dec 3;9:1700. doi: 10.3389/fpls.2018.01700 (PMC6294130; doi:10.3389/fpls.2018.01700)
Supplement: Table S1 — Identity of the 19 Espeletia populations used in this study and spanning 162 samples growing in 3 different habitats and 6 localities. Taxa names follow Cuatrecasas (2013). Populations’ abbreviations are given by the combination of codes for localities and ecotypes. Localities are coded as follows: Chingaza (CH), Cocuy (CO), Guantiva (GU), Santurbán (SA), Sumapaz (SU) and Ruíz (RU). Ecotypes are coded as follows: caulescent populations from the cloudy forest (F), caulescent populations from wind-sheltered well-irrigated depressions (W) and acaulescent populations from wind-exposed drier slopes (D). Under “Ecology” habitats are coded using an ordinal scale based on the theoretical exposure to frost and the theoretical soil moisture content. [file Table_1.XLSX]

## Sheet: Sheet1
	Population abbreviation	Locality	Locality abbreviation	Species' name	Habitat	Species code	Latitude	Longitude	Altitude (m)	Specimen in the locality	Ecology (frost)	Ecology (humidity)	Number of individuals
	CH-D	Chingaza	CH	Espeletia grandiflora	Dry	CHGR	4.72405	-73.8576	3140	ICN397207	3	1	8
	CH-F	Chingaza	CH	Espeletia uribei	Forest	CHUR	4.71629	-73.8619	3040	ICN51227	1	2	10
	CH-W	Chingaza	CH	Espeletia killipii	Wet	CHKI	4.7221	-73.8551	3060	ICN519526	2	3	10
	CO-D	Cocuy	CO	Espeletiopsis colombiana	Dry	COPE	6.37238	-72.4784	4080	ICN505389	3	1	10
	CO-F	Cocuy	CO	Espeletia lopezii	Forest	COBO	6.34093	-72.4777	3795	ICN430637	1	2	8
	CO-W	Cocuy	CO	Espeletiopsis jimenez-quesadae	Wet	COPA	6.35426	-72.4827	3800	ICN19488	2	3	8
	GU-DI	Guantiva	GU	Espeletia boyasensis	Dry	GUPE	6.12455	-72.8062	3200	ICN348962	3	1	10
	GU-DII	Guantiva	GU	Espeletia congestiflora	Dry	GURA	6.12514	-72.8064	3195	ICN305385	3	1	10
	GU-F	Guantiva	GU	Espeletia arbelaezii	Forest	GUBO	6.1702	-72.7628	3260	ICN424398	1	2	9
	GU-W	Guantiva	GU	Espeletia discoidea	Wet	GUHU	6.12637	-72.8071	3160	ICN305417	2	3	10
	RU-D	Ruiz	RU	Espeletia hartwegiana	Dry	RUBA	4.9729	-75.3504	4200	ICN109581	3	1	8
	RU-F	Ruiz	RU	Espeletia hartwegiana	Forest	RUAL	4.97204	-75.3617	3820	ICN109581	1	2	8
	RU-W	Ruiz	RU	Espeletia hartwegiana	Wet	RUHU	4.9706	-75.3579	3900	ICN109581	2	3	8
	SA-D	Santurbán	SA	Espeletia estanislana	Dry	SALA	7.28613	-72.8745	3860	ICN19421	3	1	5
	SA-F	Santurbán	SA	Espeletia standleyana	Forest	SAAL	7.28811	-72.8718	3800	ICN115676	1	2	6
	SA-W	Santurbán	SA	Espeletia conglomerata	Wet	SAHU	7.29204	-72.8765	3885	ICN201610	2	3	5
	SU-D	Sumapaz	SU	Espeletia argentea	Dry	SUGR	4.25005	-74.188	3660	ICN229801	3	1	10
	SU-F	Sumapaz	SU	Espeletia cabrerensis	Forest	SUBO	4.3471	-74.1995	3400	ICN122797	1	2	10
	SU-W	Sumapaz	SU	Espeletia summapacis	Wet	SUHU	4.29108	-74.2047	3700	ICN463936	2	3	9
	*ICN: Instituto de Ciencias Naturales de la Universidad Nacional de Colombia
